# Supplementary material for: Impact of COVID-19 Vaccination on Heart Rate Variability: A Systematic Review
Source: MDPI journal article supplement (doi:10.3390/vaccines10122095), 2022-12-07
Supplement: s1 [file s1]

**Table S2. Search strategies used in each database**

**Medline via PubMed**

|    | Searches                                                                                                                                                              | Results    |
|----|-----------------------------------------------------------------------------------------------------------------------------------------------------------------------|------------|
| #1 | COVID-19[MH] OR SARS-CoV-2[MH] OR COVID-19[TIAB] OR SARS-CoV-2[TIAB] OR (wuhan[TIAB] AND coronavirus[TIAB]) OR 2019-nCoV[TIAB] OR 2019nCoV[TIAB]                      | 274,311    |
| #2 | HRV[TIAB] OR “heart rate variability”[TIAB] OR “heart rate variation”[TIAB] OR “heart beat variability”[TIAB] OR “heart beat variation”[TIAB] OR “RR variation”[TIAB] | 24,840     |
| #3 | #1 AND #2                                                                                                                                                             | <b>143</b> |

**EMBASE via Elsevier**

|    | Searches                                                                                                                                                                                                                                                                                                 | Results    |
|----|----------------------------------------------------------------------------------------------------------------------------------------------------------------------------------------------------------------------------------------------------------------------------------------------------------|------------|
| #1 | ‘coronavirus disease 2019’/exp OR ‘coronavirus disease 2019’:ab,ti OR COVID-19:ab,ti OR ‘Severe acute respiratory syndrome coronavirus 2’/exp OR ‘Severe acute respiratory syndrome coronavirus 2’:ab,ti OR SARS-CoV-2:ab,ti OR (wuhan:ab,ti AND coronavirus:ab,ti) OR 2019-nCoV:ab,ti OR 2019nCoV:ab,ti | 308,753    |
| #2 | ‘heart rate variability’/exp OR HRV:ab,ti OR ‘heart rate variability’:ab,ti OR ‘heart rate variation’:ab,ti OR ‘heart beat variability’:ab,ti OR ‘heart beat variation’:ab,ti OR ‘RR variation’:ab,ti                                                                                                    | 42,906     |
| #3 | #1 AND #2                                                                                                                                                                                                                                                                                                | <b>233</b> |

**PsycARTICLES via ProQuest**

|    | Searches                                                                                                                                                                                  | Results  |
|----|-------------------------------------------------------------------------------------------------------------------------------------------------------------------------------------------|----------|
| #1 | SU(COVID-19) OR SU(SARS-CoV-2) OR TIAB(COVID-19) OR TIAB(SARS-CoV-2) OR (TIAB(wuhan) AND TIAB(coronavirus)) OR TIAB(2019-nCoV) OR TIAB(2019nCoV)                                          | 1,146    |
| #2 | SU(heart rate variability) OR TIAB(HRV) OR TIAB(heart rate variability) OR TIAB(heart rate variation) OR TIAB(heart beat variability) OR TIAB(heart beat variation) OR TIAB(RR variation) | 233      |
| #3 | #1 AND #2                                                                                                                                                                                 | <b>0</b> |

**CINAHL via EBSCO**

|    | Searches                                                                                                                                                                   | Results  |
|----|----------------------------------------------------------------------------------------------------------------------------------------------------------------------------|----------|
| #1 | COVID-19[MH] OR SARS-CoV-2[MH] OR COVID-19[TX] OR SARS-CoV-2[TX] OR (wuhan[TX] AND coronavirus[TX]) OR 2019-nCoV[TX] OR 2019nCoV[TX]                                       | 152      |
| #2 | Heart Rate Variability[MH] OR HRV[TX] heart rate variability[TX] OR heart rate variation[TX] OR heart beat variability[TX] OR heart beat variation[TX] OR RR variation[TX] | 25       |
| #3 | #1 AND #2                                                                                                                                                                  | <b>0</b> |
