# Supplementary material for: Impact of COVID-19 Vaccination on Heart Rate Variability: A Systematic Review
Source: MDPI journal article supplement (doi:10.3390/vaccines10122095), 2022-12-07

**Figure S1. Meta-analysis on RMSSD (ms) after vaccination data from Presby et al. (2022)**

### 1-day after the dose

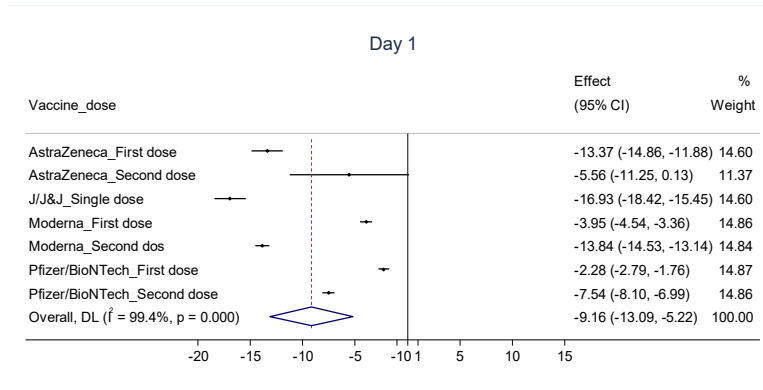

### 2-day after the dose

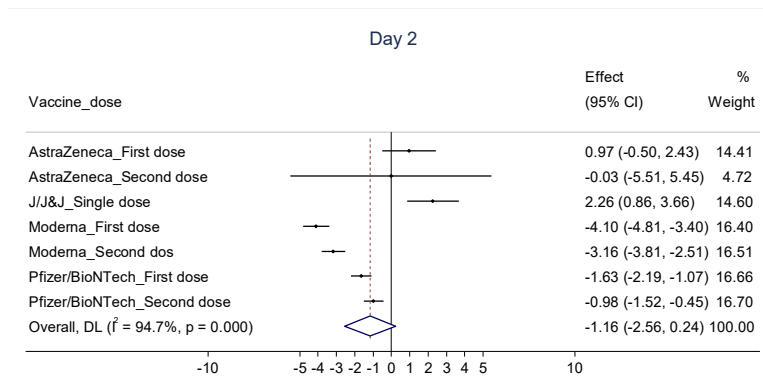

### 3-day after the dose

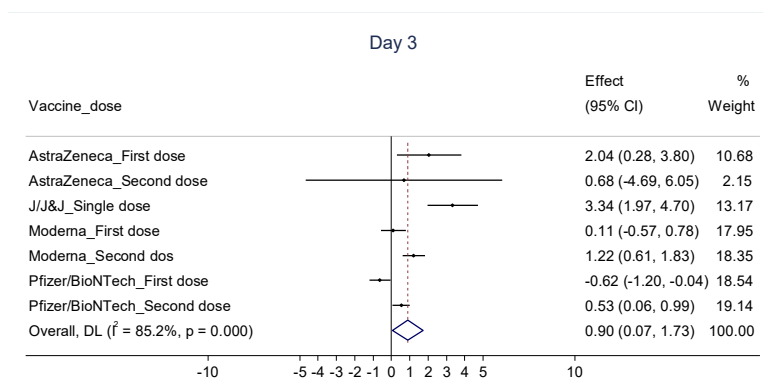

## 4-day after the dose

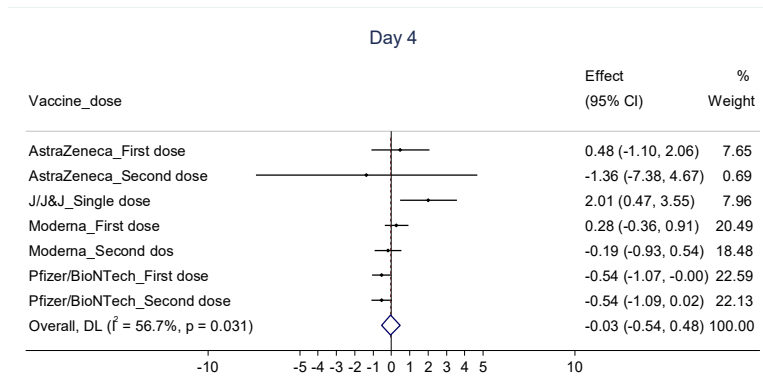

## 5-day after the dose

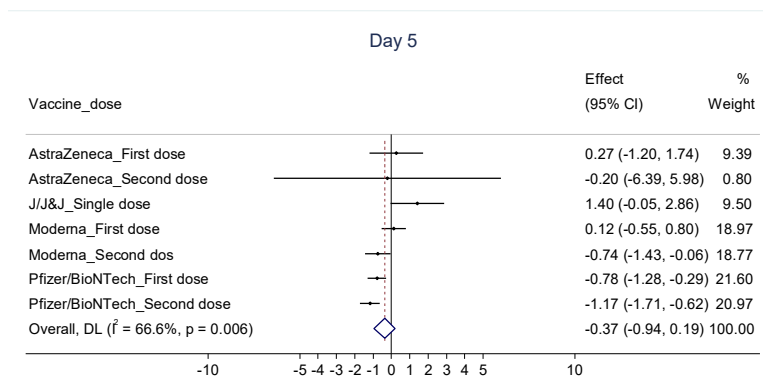

## 6-day after the dose

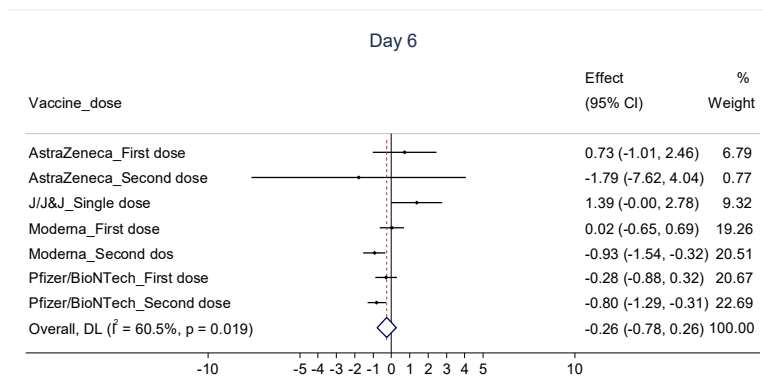

7-day after the dose

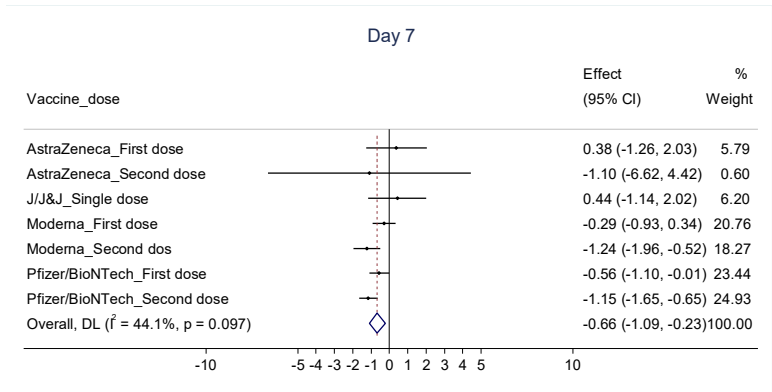

Supplement: s1 [file s1]
